# Supplementary material
Source: PubMed Central journal article supplement (PMC8791030)
Supplement: NIHMS1765107-supplement-Supplementary_Table_1.pdf [file NIHMS1765107-supplement-Supplementary_Table_1.pdf]

# PANOPLY: A cloud-based platform for automated and reproducible proteogenomic data analysis

## SUPPLEMENTARY TABLE 1

All supplementary information is available online at **GitHub** (<https://github.com/broadinstitute/PANOPLY>) and **Terra** (<https://app.terra.bio/>), and these resource URLs are included in the main text. Here we tabulate these for convenient access.

| Category                    | Item                        | Location (URL)                                                                                                                                                                                    | Notes                                                                                                                                                                 |
|-----------------------------|-----------------------------|---------------------------------------------------------------------------------------------------------------------------------------------------------------------------------------------------|-----------------------------------------------------------------------------------------------------------------------------------------------------------------------|
| <b>PANOPLY Release v1.0</b> | PANOPLY pipelines           | <a href="https://app.terra.bio/#workspaces/broad-firecloud-cptac/PANOPLY_Production_Pipelines_v1_0">https://app.terra.bio/#workspaces/broad-firecloud-cptac/PANOPLY_Production_Pipelines_v1_0</a> | Terra workspace with pre-configured pipelines, including startup notebook for easy data input and workspace configuration                                             |
|                             | PANOPLY modules             | <a href="https://app.terra.bio/#workspaces/broad-firecloud-cptac/PANOPLY_Production_Modules_v1_0">https://app.terra.bio/#workspaces/broad-firecloud-cptac/PANOPLY_Production_Modules_v1_0</a>     | Terra workspace with all individual modules. This enables users to pick and choose modules and customize execution, but requires more knowledge of setting up inputs. |
| <b>Tutorial</b>             | Tutorial description        | <a href="https://github.com/broadinstitute/PANOPLY/wiki/PANOPLY-Tutorial">https://github.com/broadinstitute/PANOPLY/wiki/PANOPLY-Tutorial</a>                                                     | Step-by-step instruction on running the PANOPLY tutorial                                                                                                              |
|                             | Tutorial workspace          | <a href="https://app.terra.bio/#workspaces/broad-firecloud-cptac/PANOPLY_Tutorial">https://app.terra.bio/#workspaces/broad-firecloud-cptac/PANOPLY_Tutorial</a>                                   | Terra workspace with tutorial instructions, data, analysis and results                                                                                                |
| <b>Case Studies</b>         | BRCA                        | <a href="https://app.terra.bio/#workspaces/broad-firecloud-cptac/PANOPLY_CPTAC_BRCA">https://app.terra.bio/#workspaces/broad-firecloud-cptac/PANOPLY_CPTAC_BRCA</a>                               | Terra workspace with data, analysis and results from the (Krug, et al.,, 2020, <i>Cell</i> ) breast cancer study                                                      |
|                             | LUAD                        | <a href="https://app.terra.bio/#workspaces/broad-firecloud-cptac/PANOPLY_CPTAC_LUAD">https://app.terra.bio/#workspaces/broad-firecloud-cptac/PANOPLY_CPTAC_LUAD</a>                               | Terra workspace with data, analysis and results from the (Gillette, et al.,, 2020, <i>Cell</i> ) lung adenocarcinoma study                                            |
| <b>Code</b>                 | Code for v1.0 release       | <a href="https://github.com/broadinstitute/PANOPLY/tree/release-1_0">https://github.com/broadinstitute/PANOPLY/tree/release-1_0</a>                                                               | Code for current release of PANOPLY                                                                                                                                   |
|                             | Development code repository | <a href="https://github.com/broadinstitute/PANOPLY">https://github.com/broadinstitute/PANOPLY</a>                                                                                                 | Includes release and development code                                                                                                                                 |

|                      |                                                        |                                                                                                                                                               |                                                                                                            |
|----------------------|--------------------------------------------------------|---------------------------------------------------------------------------------------------------------------------------------------------------------------|------------------------------------------------------------------------------------------------------------|
|                      |                                                        |                                                                                                                                                               |                                                                                                            |
| <b>Methods</b>       | Computational methods used in PANOPLY analysis modules | <a href="https://github.com/broadinstitute/PANOPLY/wiki/Data-Analysis-Modules">https://github.com/broadinstitute/PANOPLY/wiki/Data-Analysis-Modules</a>       | Documentation for each data analysis module includes a description of methods, with appropriate references |
|                      | Data pre-processing methods                            | <a href="https://github.com/broadinstitute/PANOPLY/wiki/Data-Preparation-Modules">https://github.com/broadinstitute/PANOPLY/wiki/Data-Preparation-Modules</a> | Documentation for each module includes a description of methods, with appropriate references               |
| <b>Documentation</b> | PANOPLY documentation                                  | <a href="https://github.com/broadinstitute/PANOPLY/wiki">https://github.com/broadinstitute/PANOPLY/wiki</a>                                                   | Detailed documentation for each PANOPLY module, including description of method, inputs and outputs        |
|                      | Interpreting PANOPLY reports and results               | <a href="https://github.com/broadinstitute/PANOPLY/wiki/Navigating-Results">https://github.com/broadinstitute/PANOPLY/wiki/Navigating-Results</a>             | Description of interactive reports generated by PANOPLY in the context of the tutorial dataset             |
|                      | Advanced uses                                          | <a href="https://github.com/broadinstitute/PANOPLY/wiki/Customizing-PANOPLY">https://github.com/broadinstitute/PANOPLY/wiki/Customizing-PANOPLY</a>           | Customizing PANOPLY and adding new analysis modules                                                        |
|                      | PANOPLY without Terra                                  | <a href="https://github.com/broadinstitute/PANOPLY/wiki/PANOPLY-without-Terra">https://github.com/broadinstitute/PANOPLY/wiki/PANOPLY-without-Terra</a>       | Using PANOPLY on a local computer, without accessing Terra on the cloud.                                   |
